# Supplementary material for: Association Between Oral Metformin Use and the Development of Age-Related Macular Degeneration in Diabetic Patients: A Systematic Review and Meta-Analysis
Source: PubMed Central journal article supplement (PMC9749867; doi:10.1167/iovs.63.13.10), 2022-12-09
Supplement: iovs-63-13-10_s001.pdf [file iovs-63-13-10_s001.pdf]

## **Supplementary material**

**Supplementary Table 1. PRISMA checklist**

**Supplementary Table 2. Search Strategies Modified in (a) MEDLINE, (b) Embase, (c) Cochrane Library, and (d) Web of Science**

**Supplementary Table 3. Adjusted Covariates of Included Studies**

**Supplementary Table 4. Sensitivity Analysis (a) Leave-one-out Analysis (b) Removing Studies with High Risk of Bias**

**Supplementary Figure 1. Summary of Risk of Bias**

**Supplementary Figure 2. Subgroup Analysis of AMD According to AMD subtypes**

**Supplementary Figure 3. Subgroup Analysis of AMD According to Ethnicity**

**Supplementary Figure 4. Subgroup Analysis of AMD According to Study Design**

**Supplementary Figure 5. Subgroup Analysis of AMD According to Sex**

**Supplementary Figure 6. Subgroup Analysis of AMD According to Ascertainment of AMD**

**Supplementary Table 1. PRISMA checklist**

| Section and Topic             | Item # | Checklist item                                                                                                                                                                                                                                                                                       | Reported on page No   |
|-------------------------------|--------|------------------------------------------------------------------------------------------------------------------------------------------------------------------------------------------------------------------------------------------------------------------------------------------------------|-----------------------|
| <b>TITLE</b>                  |        |                                                                                                                                                                                                                                                                                                      |                       |
| Title                         | 1      | Identify the report as a systematic review.                                                                                                                                                                                                                                                          | 1                     |
| <b>ABSTRACT</b>               |        |                                                                                                                                                                                                                                                                                                      |                       |
| Abstract                      | 2      | See the PRISMA 2020 for Abstracts checklist.                                                                                                                                                                                                                                                         | 3                     |
| <b>INTRODUCTION</b>           |        |                                                                                                                                                                                                                                                                                                      |                       |
| Rationale                     | 3      | Describe the rationale for the review in the context of existing knowledge.                                                                                                                                                                                                                          | 4                     |
| Objectives                    | 4      | Provide an explicit statement of the objective(s) or question(s) the review addresses.                                                                                                                                                                                                               | 4                     |
| <b>METHODS</b>                |        |                                                                                                                                                                                                                                                                                                      |                       |
| Eligibility criteria          | 5      | Specify the inclusion and exclusion criteria for the review and how studies were grouped for the syntheses.                                                                                                                                                                                          | 5-6                   |
| Information sources           | 6      | Specify all databases, registers, websites, organisations, reference lists and other sources searched or consulted to identify studies. Specify the date when each source was last searched or consulted.                                                                                            | 5                     |
| Search strategy               | 7      | Present the full search strategies for all databases, registers and websites, including any filters and limits used.                                                                                                                                                                                 | Supplementary Table 2 |
| Selection process             | 8      | Specify the methods used to decide whether a study met the inclusion criteria of the review, including how many reviewers screened each record and each report retrieved, whether they worked independently, and if applicable, details of automation tools used in the process.                     | 6, Fig. 1             |
| Data collection process       | 9      | Specify the methods used to collect data from reports, including how many reviewers collected data from each report, whether they worked independently, any processes for obtaining or confirming data from study investigators, and if applicable, details of automation tools used in the process. | 6                     |
| Data items                    | 10a    | List and define all outcomes for which data were sought. Specify whether all results that were compatible with each outcome domain in each study were sought (e.g. for all measures, time points, analyses), and if not, the methods used to decide which results to collect.                        | 7                     |
|                               | 10b    | List and define all other variables for which data were sought (e.g. participant and intervention characteristics, funding sources). Describe any assumptions made about any missing or unclear information.                                                                                         | 7                     |
| Study risk of bias assessment | 11     | Specify the methods used to assess risk of bias in the included studies, including details of the tool(s) used, how many reviewers assessed each study and whether they worked independently, and if applicable, details of automation tools used in the process.                                    | 6                     |
| Effect measures               | 12     | Specify for each outcome the effect measure(s) (e.g. risk ratio, mean difference) used in the synthesis or presentation of results.                                                                                                                                                                  | 7                     |
| Synthesis methods             | 13a    | Describe the processes used to decide which studies were eligible for each synthesis (e.g. tabulating the study intervention characteristics and comparing against the planned groups for each synthesis (item #5)).                                                                                 | 7                     |
|                               | 13b    | Describe any methods required to prepare the data for presentation or synthesis, such as handling of missing summary statistics, or data conversions.                                                                                                                                                | 7                     |
|                               | 13c    | Describe any methods used to tabulate or visually display results of individual studies and syntheses.                                                                                                                                                                                               | Table 1               |
|                               | 13d    | Describe any methods used to synthesize results and provide a rationale for the choice(s). If meta-analysis was performed, describe the model(s), method(s) to identify the presence and extent of statistical heterogeneity, and software package(s) used.                                          | 7                     |
|                               | 13e    | Describe any methods used to explore possible causes of heterogeneity among study results (e.g. subgroup analysis, meta-regression).                                                                                                                                                                 | 7                     |

| Section and Topic             | Item # | Checklist item                                                                                                                                                                                                                                                                       | Reported on page No                  |
|-------------------------------|--------|--------------------------------------------------------------------------------------------------------------------------------------------------------------------------------------------------------------------------------------------------------------------------------------|--------------------------------------|
|                               | 13f    | Describe any sensitivity analyses conducted to assess robustness of the synthesized results.                                                                                                                                                                                         | 7                                    |
| Reporting bias assessment     | 14     | Describe any methods used to assess risk of bias due to missing results in a synthesis (arising from reporting biases).                                                                                                                                                              | Not applicable                       |
| Certainty assessment          | 15     | Describe any methods used to assess certainty (or confidence) in the body of evidence for an outcome.                                                                                                                                                                                | Nil                                  |
| <b>RESULTS</b>                |        |                                                                                                                                                                                                                                                                                      |                                      |
| Study selection               | 16a    | Describe the results of the search and selection process, from the number of records identified in the search to the number of studies included in the review, ideally using a flow diagram.                                                                                         | 8                                    |
|                               | 16b    | Cite studies that might appear to meet the inclusion criteria, but which were excluded, and explain why they were excluded.                                                                                                                                                          | Fig. 1                               |
| Study characteristics         | 17     | Cite each included study and present its characteristics.                                                                                                                                                                                                                            | 8-9                                  |
| Risk of bias in studies       | 18     | Present assessments of risk of bias for each included study.                                                                                                                                                                                                                         | 9, Supplementary Fig. 1              |
| Results of individual studies | 19     | For all outcomes, present, for each study: (a) summary statistics for each group (where appropriate) and (b) an effect estimate and its precision (e.g. confidence/credible interval), ideally using structured tables or plots.                                                     | 9-10, Fig.2                          |
| Results of syntheses          | 20a    | For each synthesis, briefly summarise the characteristics and risk of bias among contributing studies.                                                                                                                                                                               | 9, Supplementary Fig. 1              |
|                               | 20b    | Present results of all statistical syntheses conducted. If meta-analysis was done, present for each the summary estimate and its precision (e.g. confidence/credible interval) and measures of statistical heterogeneity. If comparing groups, describe the direction of the effect. | 9-10, Fig. 2, Supplementary Fig. 2-6 |
|                               | 20c    | Present results of all investigations of possible causes of heterogeneity among study results.                                                                                                                                                                                       | 9-10, Table 2                        |
|                               | 20d    | Present results of all sensitivity analyses conducted to assess the robustness of the synthesized results.                                                                                                                                                                           | 10, Supplementary table 4            |
| Reporting biases              | 21     | Present assessments of risk of bias due to missing results (arising from reporting biases) for each synthesis assessed.                                                                                                                                                              | Not applicable                       |
| Certainty of evidence         | 22     | Present assessments of certainty (or confidence) in the body of evidence for each outcome assessed.                                                                                                                                                                                  | Nil                                  |
| <b>DISCUSSION</b>             |        |                                                                                                                                                                                                                                                                                      |                                      |
| Discussion                    | 23a    | Provide a general interpretation of the results in the context of other evidence.                                                                                                                                                                                                    | 11-12                                |
|                               | 23b    | Discuss any limitations of the evidence included in the review.                                                                                                                                                                                                                      | 14-15                                |
|                               | 23c    | Discuss any limitations of the review processes used.                                                                                                                                                                                                                                | 14-15                                |
|                               | 23d    | Discuss implications of the results for practice, policy, and future research.                                                                                                                                                                                                       | 15                                   |

| Section and Topic                              | Item # | Checklist item                                                                                                                                                                                                                             | Reported on page No |
|------------------------------------------------|--------|--------------------------------------------------------------------------------------------------------------------------------------------------------------------------------------------------------------------------------------------|---------------------|
| <b>OTHER INFORMATION</b>                       |        |                                                                                                                                                                                                                                            |                     |
| Registration and protocol                      | 24a    | Provide registration information for the review, including register name and registration number, or state that the review was not registered.                                                                                             | 5                   |
|                                                | 24b    | Indicate where the review protocol can be accessed, or state that a protocol was not prepared.                                                                                                                                             | 5                   |
|                                                | 24c    | Describe and explain any amendments to information provided at registration or in the protocol.                                                                                                                                            | Nil                 |
| Support                                        | 25     | Describe sources of financial or non-financial support for the review, and the role of the funders or sponsors in the review.                                                                                                              | 2                   |
| Competing interests                            | 26     | Declare any competing interests of review authors.                                                                                                                                                                                         | 2                   |
| Availability of data, code and other materials | 27     | Report which of the following are publicly available and where they can be found: template data collection forms; data extracted from included studies; data used for all analyses; analytic code; any other materials used in the review. | 15                  |

## Supplementary Table 2

Search Strategies Modified in Ovid MEDLINE (a), Ovid Embase (b), Cochrane Library (c), and Web of Science (d)

### a. Search strategy in MEDLINE (via Ovid MEDLINE(R), 1946 to present; search date: 2022/08/03)

| #  | Search syntax                                           | Citations found |
|----|---------------------------------------------------------|-----------------|
| 1  | ((macul* or retina* or choroid*) adj4 degenera*).tw.    | 35321           |
| 2  | ((macul* or retina* or choroid*) adj4 neovascular*).tw. | 14351           |
| 3  | ((macul* or geograph*) adj4 atroph*).tw.                | 2890            |
| 4  | maculopath*.tw.                                         | 5156            |
| 5  | (AMD or ARMD or CNV or GA).tw.                          | 75602           |
| 6  | exp Macular Degeneration/                               | 28615           |
| 7  | exp Retinal Degeneration/                               | 48854           |
| 8  | exp Choroidal Neovascularization/                       | 6547            |
| 9  | exp Geographic Atrophy/                                 | 960             |
| 10 | exp Retinal Neovascularization/                         | 3326            |
| 11 | 1 or 2 or 3 or 4 or 5 or 6 or 7 or 8 or 9 or 10         | 134451          |
| 12 | metformin*.tw.                                          | 25211           |
| 13 | exp Metformin/                                          | 16711           |
| 14 | 12 or 13                                                | 27192           |
| 15 | 11 and 14                                               | 109             |

### b. Search strategy in Embase (via Ovid Embase, 1974 to present; search date: 2022/08/03)

| #  | Search syntax                                           | Citations found |
|----|---------------------------------------------------------|-----------------|
| 1  | ((macul* or retina* or choroid*) adj4 degenera*).tw.    | 46695           |
| 2  | ((macul* or retina* or choroid*) adj4 neovascular*).tw. | 18689           |
| 3  | (geograph* adj4 atroph*).tw.                            | 2471            |
| 4  | exp retina degeneration/                                | 49920           |
| 5  | exp retina neovascularization/                          | 6766            |
| 6  | exp retina maculopathy/                                 | 56365           |
| 7  | exp macular degeneration/                               | 22573           |
| 8  | exp retina macula age related degeneration/             | 13000           |
| 9  | exp retina macula degeneration/                         | 22573           |
| 10 | exp geographic atrophy/                                 | 2294            |

|    |                                                       |        |
|----|-------------------------------------------------------|--------|
| 11 | maculopath*.tw.                                       | 6525   |
| 12 | 1 or 2 or 3 or 4 or 5 or 6 or 7 or 8 or 9 or 10 or 11 | 114040 |
| 13 | metformin*.tw.                                        | 42701  |
| 14 | exp metformin/                                        | 77142  |
| 15 | 13 or 14                                              | 80115  |
| 16 | 12 and 15                                             | 299    |

**c. Search strategy in Cochrane Library (via Cochrane Collaboration; search date: 2022/08/03)**

| #  | Search syntax                                                     | Citations found |
|----|-------------------------------------------------------------------|-----------------|
| 1  | MeSH descriptor: [Macular Degeneration] explode all trees         | 2803            |
| 2  | MeSH descriptor: [Geographic Atrophy] explode all trees           | 155             |
| 3  | MeSH descriptor: [Retinal Degeneration] explode all trees         | 2947            |
| 4  | MeSH descriptor: [Retinal Neovascularization] explode all trees   | 86              |
| 5  | MeSH descriptor: [Choroidal Neovascularization] explode all trees | 452             |
| 6  | (macula* or retina* or choroid*) near/4 degenerat*                | 3829            |
| 7  | (macula* or retina* or choroid*) near/4 neovascu*                 | 2434            |
| 8  | geograph* near/4 atroph*                                          | 449             |
| 9  | maculopath*                                                       | 476             |
| 10 | AMD or ARMD or CNV or GA                                          | 24081           |
| 11 | #1 or #2 or #3 or #4 or #5 or #6 or #7 or #8 or #9 or #10         | 2393            |
| 12 | Metformin*                                                        | 12116           |
| 13 | MeSH descriptor: [Metformin] explode all trees                    | 4517            |
| 14 | #12 or #13                                                        | 12116           |
| 15 | #11 and #14                                                       | 123             |

**d. Search strategy in Web of Science Core Collection (2015 to present; search date: 2022/08/03)**

| # | Search syntax                                                                                                                                                                                                                          | Citations found |
|---|----------------------------------------------------------------------------------------------------------------------------------------------------------------------------------------------------------------------------------------|-----------------|
| 1 | (((((TS=((macula* or retina* or choroid*) near/4 degenerat*)) OR TS=((macula* or retina* or choroid*) near/4 neovascu*)) OR TS=(maculopath*)) OR TS=(geograph* near/4 atroph*)) OR TS=(AMD or ARMD or CNV or GA)) AND TS=(metformin*)) | 102             |

**Supplementary Table 3. Adjusted covariates of included studies**

| Source (Country)                                   | Age | Sex | BMI | Race | Socioeconomic data | Smoking | CAD | Anemia | DM | DR | HTN | Dyslipidemia | CCI | Other variables                                                                       |
|----------------------------------------------------|-----|-----|-----|------|--------------------|---------|-----|--------|----|----|-----|--------------|-----|---------------------------------------------------------------------------------------|
| Brown et al, <sup>13</sup> 2019 (US)               | •   |     |     |      |                    |         |     | •      |    |    | •   |              | •   |                                                                                       |
| Chen et al, <sup>14</sup> 2019 (Taiwan)            | •   | •   |     |      |                    |         | •   |        |    | •  | •   | •            |     | Obesity, CKD, poor DM control (insulin use), antidiabetics, antihypertensives, statin |
| Lee et al, <sup>18</sup> 2019 (South Korea)        |     |     |     |      | •                  |         | •   |        | •  |    | •   | •            | •   | Liver disease, PVD, medication history, CVA                                           |
| Steward et al, <sup>19</sup> 2020 (US)             | •   | •   |     | •    | •                  | •       |     |        |    | •  |     |              |     | Metabolic syndrome (DR)                                                               |
| Blitzer et al, <sup>12</sup> 2021 (US)             | •   | •   |     |      |                    | •       |     |        | •  | •  | •   | •            | •   | Statin, DR (PDR, NPDR), obesity, region                                               |
| Eton et al, <sup>15</sup> 2022 (US)                | •   | •   |     | •    | •                  |         |     | •      |    | •  | •   | •            |     | Region, NPDR, stroke, PVD, CKD, liver/lung disease, malignancy, DCSI                  |
| Gokhale et al, <sup>16</sup> 2022 (UK)             | •   | •   | •   | •    | •                  | •       |     |        |    |    |     |              | •   | SBP, DM complications, HbA1c, statin, CVD, CKD, hypothyroidism                        |
| Jiang et al, <sup>17</sup> 2022 (China)            | •   | •   | •   |      |                    | •       |     |        | •  |    | •   | •            |     | FBG, HbA1c, UA, Cr                                                                    |
| Vergroesen et al, <sup>20</sup> 2022 (Netherlands) | •   | •   | •   |      |                    | •       |     |        | •  |    | •   | •            | •   | Statin, antihypertensives                                                             |

BMI, body mass index; CAD, coronary artery disease; CCI, Charlson Comorbidity Index; CKD, chronic kidney disease; Cr, creatinine; CVA, cardiovascular accident; CVD, cardiovascular disease; DCSI, Diabetes Complications Severity Index; DM, diabetes mellitus; DR, diabetic retinopathy; FBG, fasting blood glucose; HTN, hypertension; NPDR, nonproliferative diabetic retinopathy; PDR, proliferative diabetic retinopathy; PVD, peripheral vascular disease; SBP, systolic blood pressure; UA, uric acid; UK, United Kingdom; US, United States.

**Supplementary Table 4. Sensitivity Analysis****(a) Leave-one out Analysis**

| <b>Study removed</b> | <b>Age-related macular degeneration</b> |                |                          |
|----------------------|-----------------------------------------|----------------|--------------------------|
|                      | <b>Pooled OR (95% CI)</b>               | <b>p-value</b> | <b>I<sup>2</sup> (%)</b> |
| Blitzer et al.       | 0.73 (0.57, 0.95)                       | 0.02*          | 96                       |
| Brown et al.         | 0.82 (0.70, 0.95)                       | <0.01**        | 96                       |
| Chen et al.          | 0.91 (0.82, 1.01)                       | 0.09           | 90                       |
| Eton et al.          | 0.73 (0.59, 0.91)                       | <0.01**        | 95                       |
| Gokhale et al.       | 0.77 (0.66, 0.91)                       | <0.01**        | 96                       |
| Jiang et al.         | 0.85 (0.74, 0.98)                       | 0.03*          | 96                       |
| Lee et al.           | 0.77 (0.66, 0.90)                       | <0.01**        | 96                       |
| Stewart et al.       | 0.82 (0.71, 0.96)                       | 0.01*          | 96                       |
| Vergroesen et al.    | 0.82 (0.71, 0.95)                       | <0.01**        | 96                       |

\* $p < 0.05$ ; \*\* $p < 0.01$

**(b) Removing Studies with High Risk of Bias**

| <b>Studies removed</b>                                | <b>Remaining no. of studies</b> | <b>Age-related macular degeneration</b> |                |                          |
|-------------------------------------------------------|---------------------------------|-----------------------------------------|----------------|--------------------------|
|                                                       |                                 | <b>Pooled OR (95% CI)</b>               | <b>p-value</b> | <b>I<sup>2</sup> (%)</b> |
| Brown et al., Chen et al.,<br>Eton et al., Lee et al. | 5                               | 0.78 (0.64, 0.95)                       | 0.01*          | 87                       |

\* $p < 0.05$ ; \*\* $p < 0.01$



**Supplementary Figure 1. Summary of Risk of Bias (ROBINS-E)**

|                 | Risk of bias due to confounding | Risk of bias from measurement of exposure | Risk of bias in selection of participants into the study | Risk of bias due to post-exposure interventions | Risk of bias due to missing data | Risk of bias from measurement of the outcome | Risk of bias in selection of the reported result | Overall risk of bias |
|-----------------|---------------------------------|-------------------------------------------|----------------------------------------------------------|-------------------------------------------------|----------------------------------|----------------------------------------------|--------------------------------------------------|----------------------|
| Blitzer 2021    | ?                               | +                                         | +                                                        | +                                               | +                                | +                                            | +                                                | ?                    |
| Brown 2019      | -                               | +                                         | +                                                        | +                                               | +                                | +                                            | +                                                | -                    |
| Chen 2019       | -                               | +                                         | +                                                        | +                                               | +                                | +                                            | +                                                | -                    |
| Eton 2022       | -                               | +                                         | +                                                        | +                                               | +                                | +                                            | +                                                | -                    |
| Gokhale 2022    | +                               | +                                         | +                                                        | +                                               | +                                | +                                            | +                                                | +                    |
| Jiang 2022      | +                               | +                                         | +                                                        | +                                               | +                                | +                                            | +                                                | +                    |
| Lee 2019        | -                               | +                                         | +                                                        | +                                               | +                                | +                                            | +                                                | -                    |
| Stewart 2020    | +                               | +                                         | +                                                        | +                                               | +                                | +                                            | +                                                | +                    |
| Vergroesen 2022 | +                               | +                                         | +                                                        | +                                               | +                                | +                                            | +                                                | +                    |

The green plus circle denotes low risk of bias, question mark circle denotes some concern, and red minus circle high risk of bias.

## Supplementary Figure 2. Subgroup Analysis of AMD According to AMD subtypes

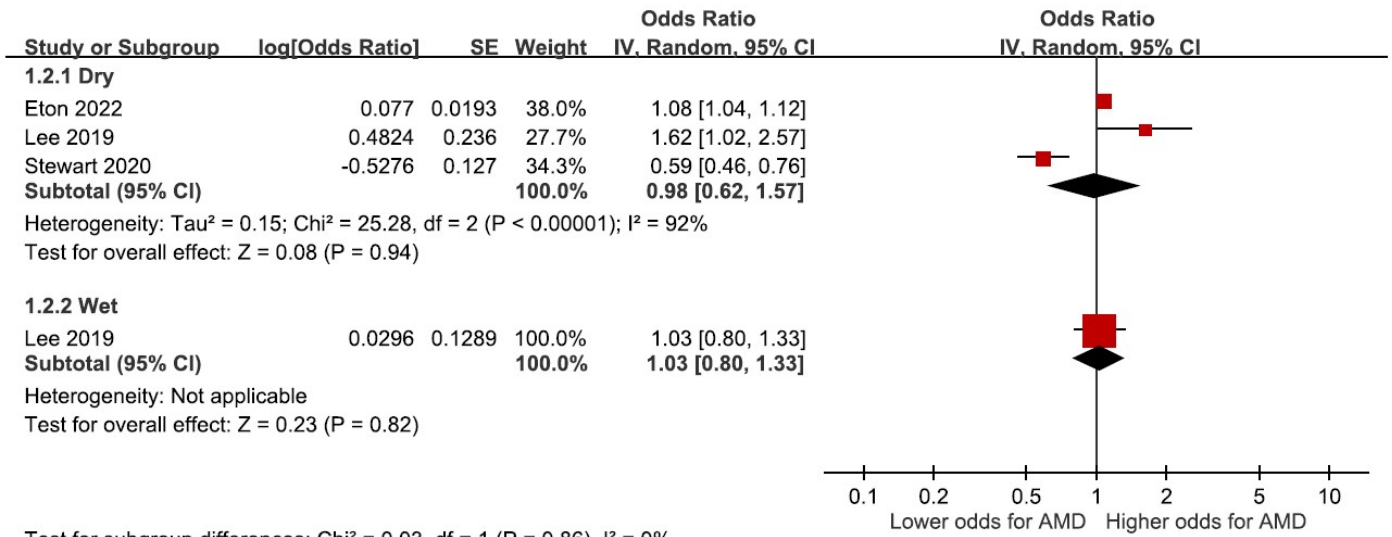

Test for subgroup differences: Chi<sup>2</sup> = 0.03, df = 1 (P = 0.86), I<sup>2</sup> = 0%

AMD, age-related macular degeneration; CI, confidence interval; IV, inverse variance; SE, standard error.

### Supplementary Figure 3. Subgroup Analysis of AMD According to Ethnicity

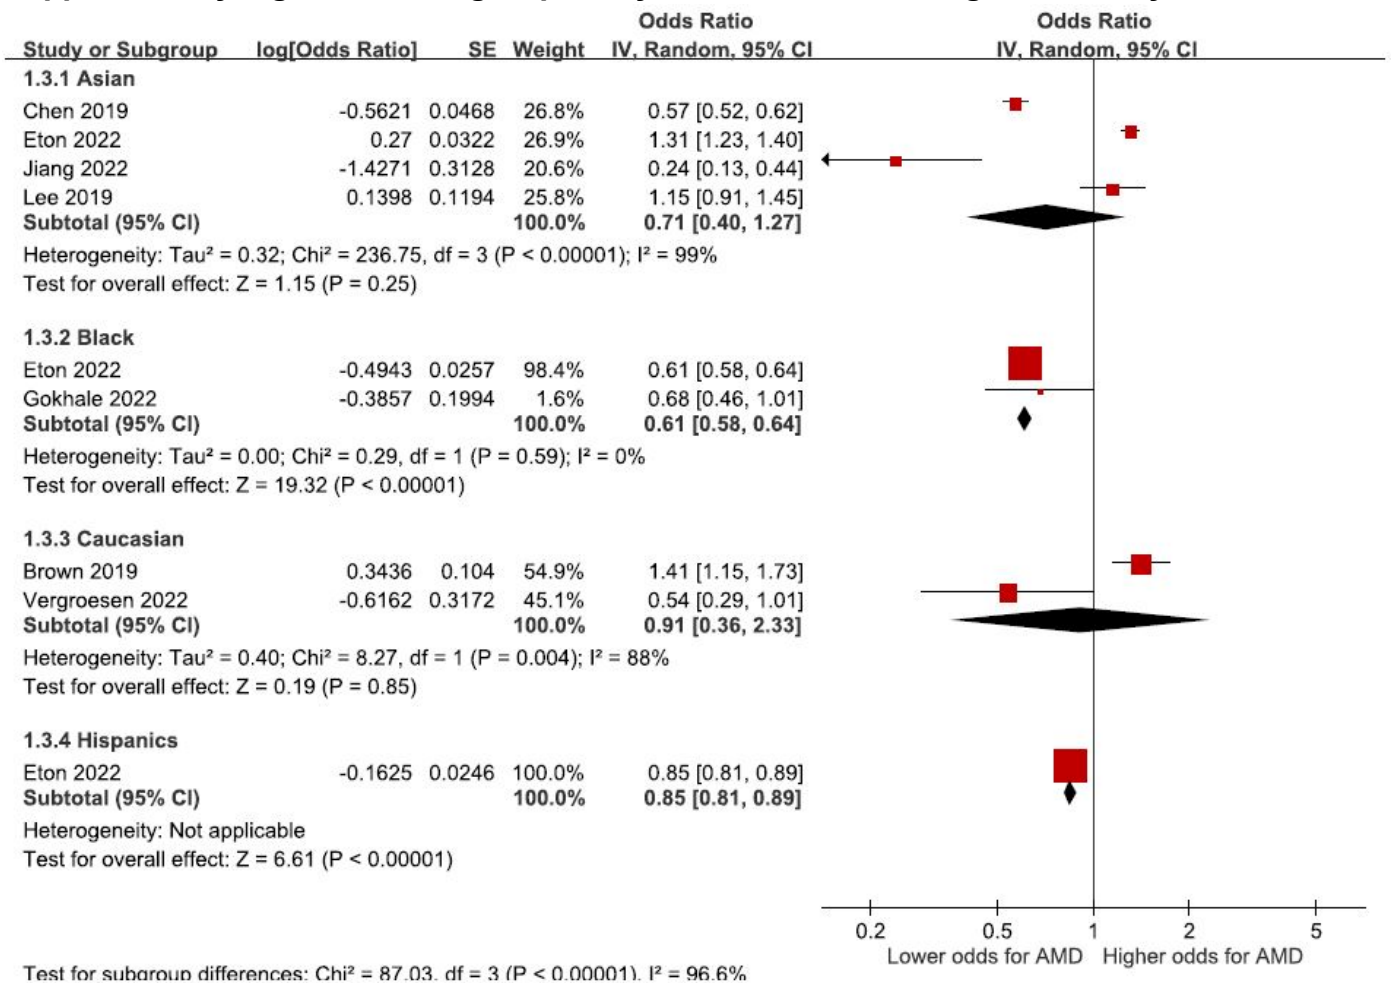

AMD, age-related macular degeneration; CI, confidence interval; IV, inverse variance; SE, standard error.

### Supplementary Figure 4. Subgroup Analysis of AMD According to Study Design

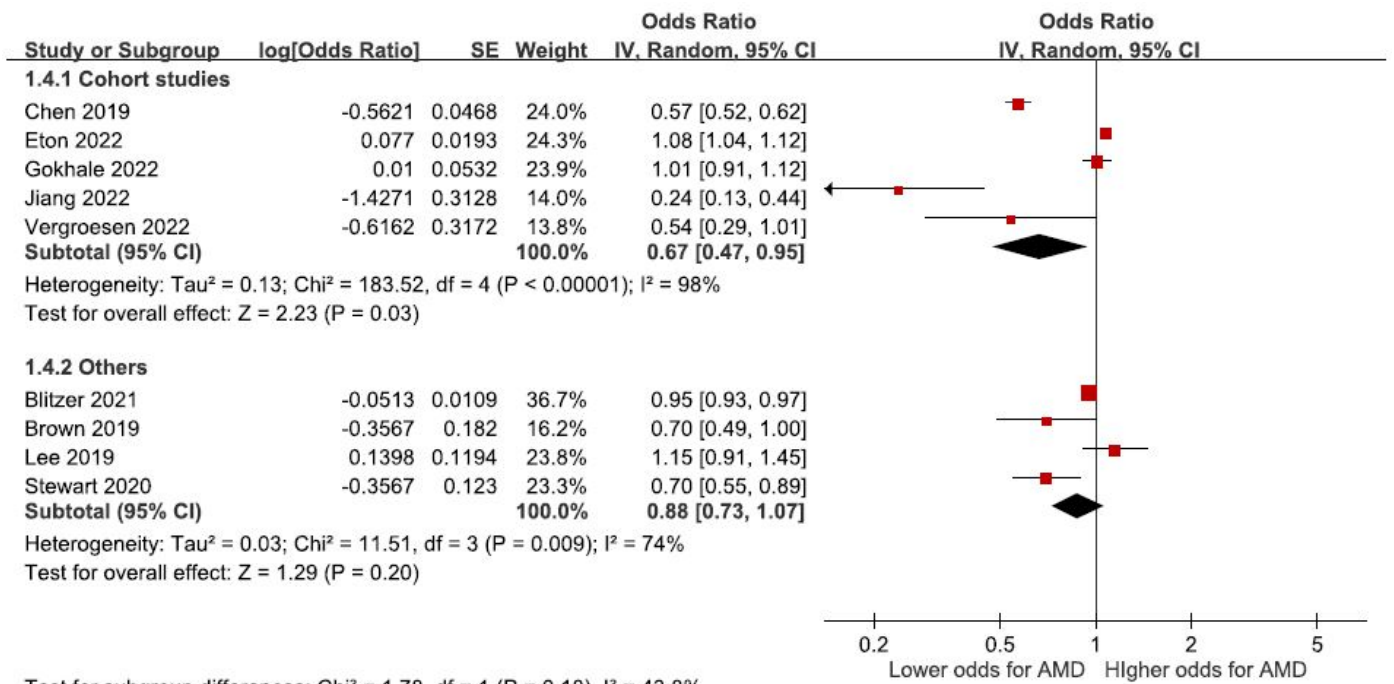

## Supplementary Figure 5. Subgroup Analysis of AMD According to Sex

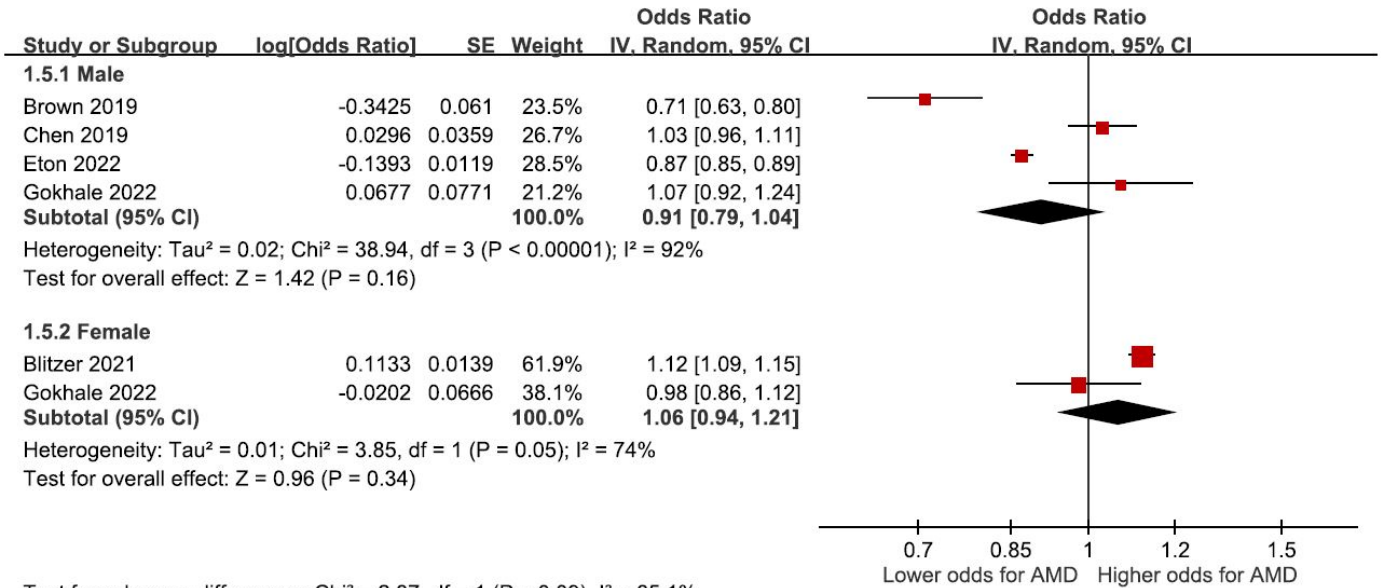

## Supplementary Figure 6. Subgroup Analysis of AMD According to Ascertainment of AMD

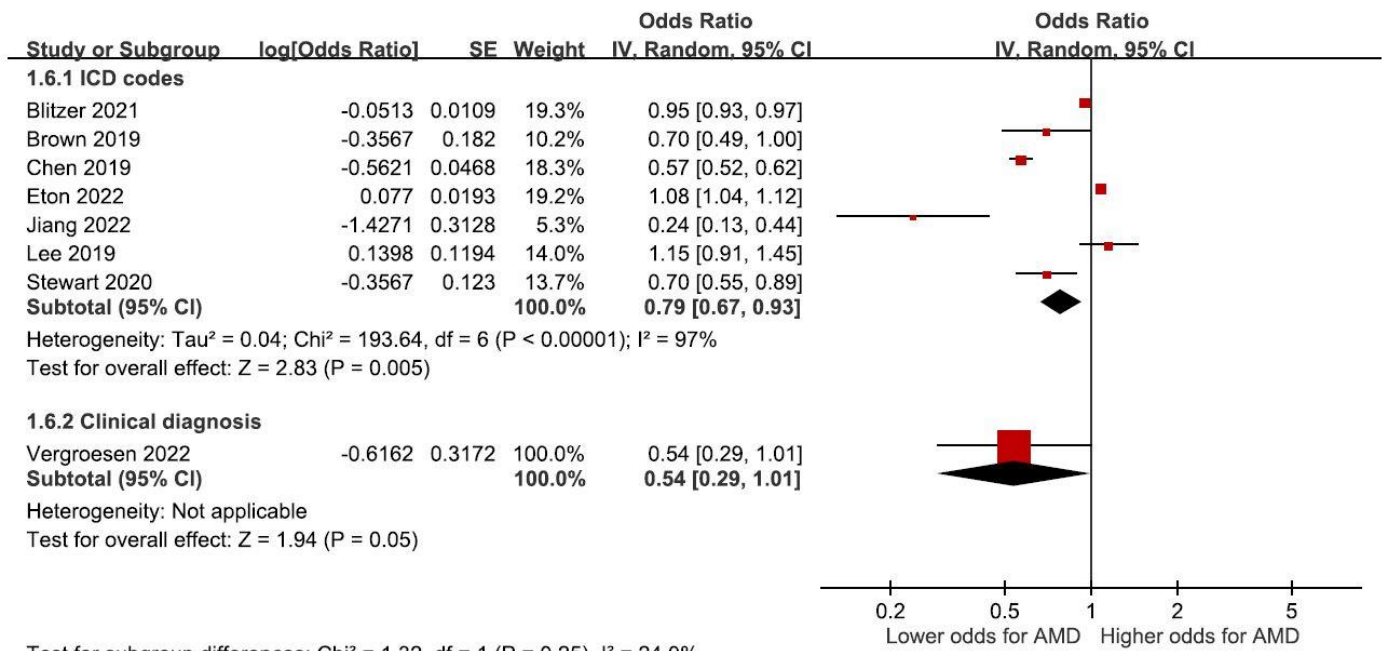

Test for subgroup differences: Chi<sup>2</sup> = 1.32, df = 1 (P = 0.25), I<sup>2</sup> = 24.0%

AMD, age-related macular degeneration; CI, confidence interval; IV, inverse variance; SE, standard error.
